# Supplementary material for: Ion-pairing in polyoxometalate chemistry: impact of fully hydrated alkali metal cations on properties of the keggin [PW12O40]3−anion
Source: Royal Society of Chemistry journal article supplement (doi:10.1039/d0dt02239j), 2020-01-01
Supplement: d0dt02239j1.pdf [file d0dt02239j1.pdf]

Supporting Materials for

**Ion-Pairing in Polyoxometalate Chemistry: Impact of Fully Hydrated Alkali  
Metal Cations on Properties of the Keggin  $[PW_{12}O_{40}]^{3-}$  Anion**

Alexey L. Kaledin,<sup>1</sup> Qiushi Yin,<sup>2</sup> Craig L. Hill,<sup>1,2</sup> Tianquan Lian,<sup>1,2</sup>  
and Djamaladdin G. Musaev<sup>1,2,\*</sup>

<sup>1</sup> Emerson Center for Scientific Computation, Emory University, Atlanta, Georgia 30322 USA

<sup>2</sup> Department of Chemistry, Emory University, Atlanta, Georgia 3032 USA

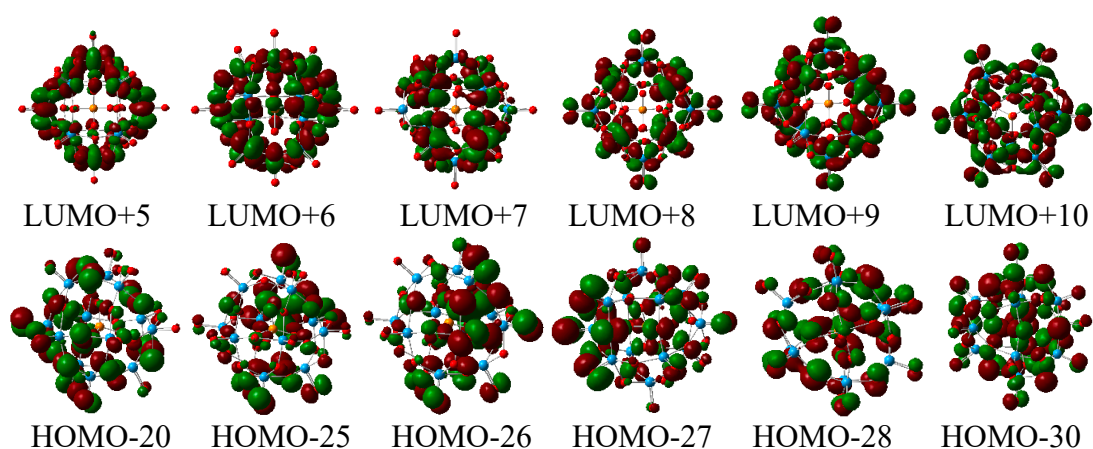

**Figure S1.** Representative molecular orbitals of  $[PW_{12}O_{40}]^{3-}$ .

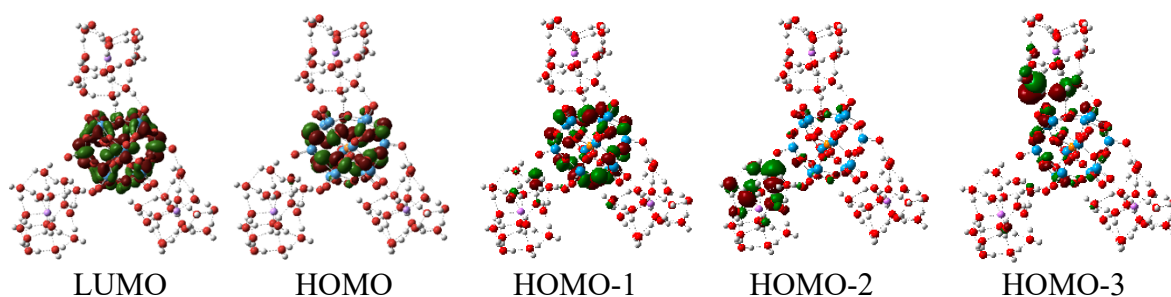

**Figure S2-a.** Representative molecular orbitals of the  $[PW_{12}O_{40}]^{3-}[Li^+(H_2O)_n]_3$  complexes.

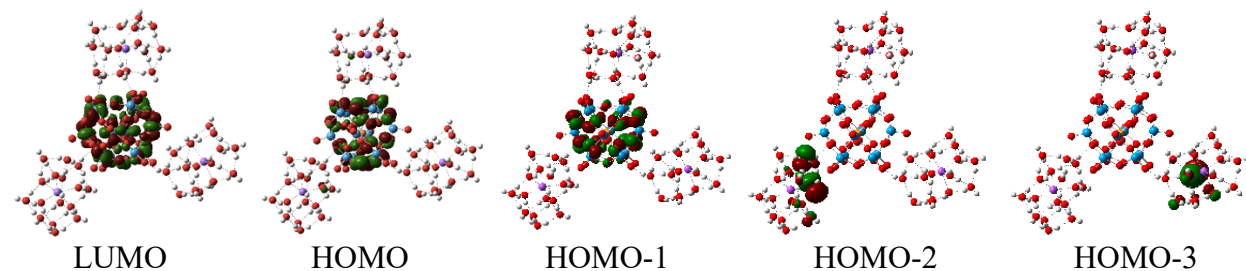

**Figure S2-b.** Representative molecular orbitals of the  $[PW_{12}O_{40}]^{3-}[Na^+(H_2O)_n]_3$  complexes.

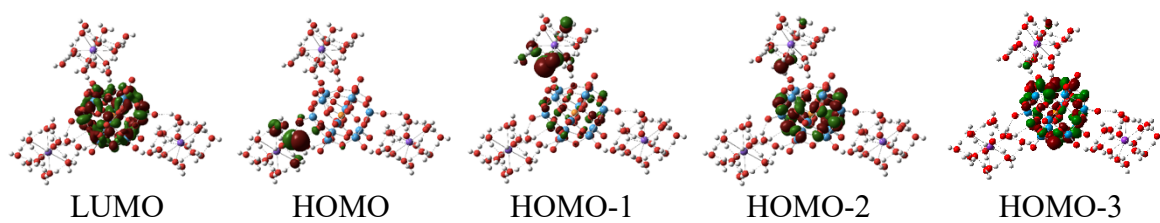

**Figure S2-c.** Representative molecular orbitals of the  $[\text{PW}_{12}\text{O}_{40}]^{3-}[\text{K}^+(\text{H}_2\text{O})_n]_3$  complexes.

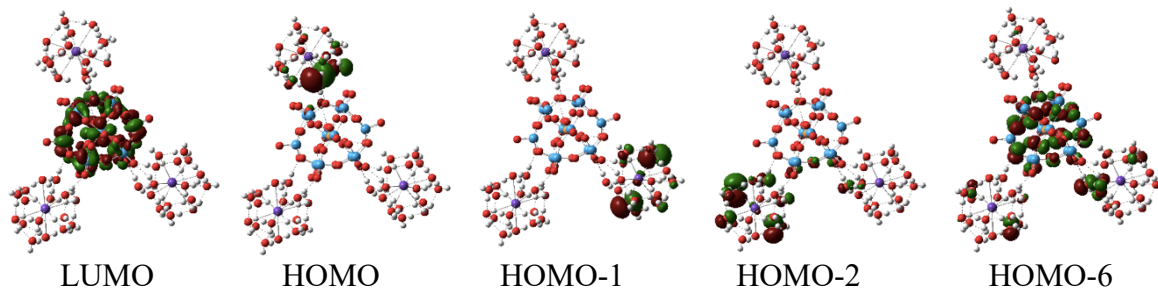

**Figure S2-d.** Representative molecular orbitals of the  $[\text{PW}_{12}\text{O}_{40}]^{3-}[\text{Rb}^+(\text{H}_2\text{O})_n]_3$  complexes.

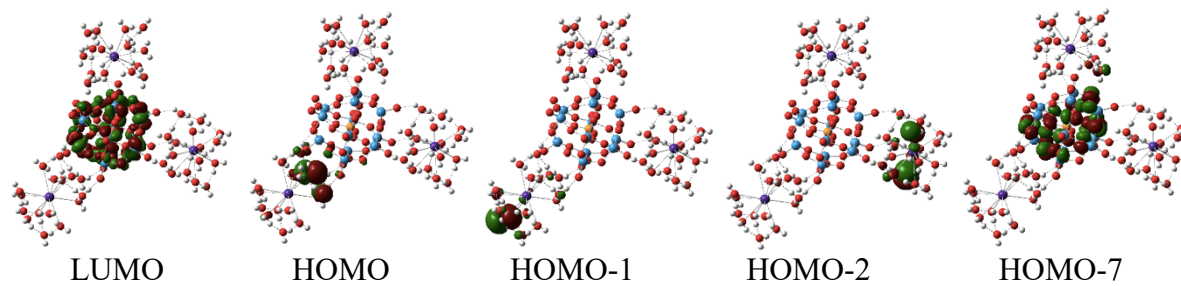

**Figure S2-e.** Representative molecular orbitals of the  $[\text{PW}_{12}\text{O}_{40}]^{3-}[\text{Cs}^+(\text{H}_2\text{O})_n]_3$  complexes.

**Table S4.** Excited state energies (eV) of the excited singlets  $S_n$ , for  $n=18-96$ , of the POM anion  $[PW_{12}O_{40}]^{3-}$  and  $[PW_{12}O_{40}]^{3-}[M^+(H_2O)_{16}]_3$  complexes.

| $S_n$ | $[PW_{12}O_{40}]^{3-}$ | M = Li | M = Na | M = K | M = Rb | M = Cs |
|-------|------------------------|--------|--------|-------|--------|--------|
| 18    | 3.391                  | 2.976  | 2.987  | 2.851 | 2.877  | 2.423  |
| 19    | 3.391                  | 2.990  | 3.006  | 2.897 | 2.896  | 2.460  |
| 20    | 3.545                  | 3.024  | 3.015  | 2.968 | 2.926  | 2.769  |
| 21    | 3.545                  | 3.049  | 3.030  | 2.980 | 2.934  | 2.794  |
| 22    | 3.546                  | 3.061  | 3.034  | 3.012 | 2.941  | 2.796  |
| 23    | 3.594                  | 3.081  | 3.036  | 3.013 | 2.954  | 2.817  |
| 24    | 3.594                  | 3.132  | 3.038  | 3.038 | 2.955  | 2.831  |
| 25    | 3.595                  | 3.134  | 3.050  | 3.051 | 2.980  | 2.831  |
| 26    | 3.602                  | 3.188  | 3.058  | 3.056 | 2.982  | 2.860  |
| 27    | 3.602                  | 3.192  | 3.062  | 3.060 | 2.987  | 2.868  |
| 28    | 3.603                  | 3.203  | 3.087  | 3.072 | 2.991  | 2.897  |
| 29    | 3.625                  | 3.211  | 3.096  | 3.083 | 2.999  | 2.906  |
| 30    | 3.626                  | 3.215  | 3.144  | 3.096 | 3.012  | 2.919  |
| 31    | 3.627                  | 3.223  | 3.151  | 3.128 | 3.037  | 2.942  |
| 32    | 3.634                  | 3.234  | 3.152  | 3.136 | 3.039  | 2.954  |
| 33    | 3.634                  | 3.262  | 3.159  | 3.140 | 3.045  | 2.955  |
| 34    | 3.635                  | 3.264  | 3.177  | 3.180 | 3.070  | 2.986  |
| 35    | 3.654                  | 3.265  | 3.186  | 3.182 | 3.096  | 2.991  |
| 36    | 3.655                  | 3.275  | 3.274  | 3.185 | 3.167  | 3.030  |
| 37    | 3.655                  | 3.282  | 3.276  | 3.203 | 3.185  | 3.049  |
| 38    | 3.658                  | 3.283  | 3.283  | 3.226 | 3.214  | 3.054  |
| 39    | 3.658                  | 3.287  | 3.285  | 3.227 | 3.218  | 3.072  |
| 40    | 3.659                  | 3.298  | 3.291  | 3.253 | 3.225  | 3.087  |
| 41    | 3.667                  | 3.306  | 3.299  | 3.260 | 3.226  | 3.107  |
| 42    | 3.667                  | 3.310  | 3.310  | 3.260 | 3.229  | 3.140  |
| 43    | 3.668                  | 3.315  | 3.316  | 3.269 | 3.237  | 3.140  |
| 44    | 3.671                  | 3.320  | 3.319  | 3.272 | 3.240  | 3.144  |
| 45    | 3.671                  | 3.325  | 3.323  | 3.290 | 3.241  | 3.147  |
| 46    | 3.671                  | 3.329  | 3.328  | 3.297 | 3.247  | 3.157  |
| 47    | 3.672                  | 3.340  | 3.335  | 3.300 | 3.248  | 3.160  |
| 48    | 3.672                  | 3.342  | 3.336  | 3.303 | 3.253  | 3.168  |
| 49    | 3.673                  | 3.344  | 3.343  | 3.305 | 3.265  | 3.174  |
| 50    | 3.684                  | 3.345  | 3.345  | 3.309 | 3.268  | 3.177  |
| 51    | 3.687                  | 3.360  | 3.356  | 3.314 | 3.271  | 3.177  |
| 52    | 3.689                  | 3.363  | 3.358  | 3.319 | 3.272  | 3.180  |
| 53    | 3.719                  | 3.367  | 3.364  | 3.321 | 3.276  | 3.183  |
| 54    | 3.719                  | 3.372  | 3.367  | 3.323 | 3.278  | 3.186  |
| 55    | 3.743                  | 3.375  | 3.370  | 3.331 | 3.280  | 3.189  |
| 56    | 3.744                  | 3.376  | 3.372  | 3.333 | 3.282  | 3.189  |
| 57    | 3.745                  | 3.378  | 3.374  | 3.335 | 3.293  | 3.192  |

|    |       |       |       |       |       |       |
|----|-------|-------|-------|-------|-------|-------|
| 58 | 3.745 | 3.386 | 3.379 | 3.337 | 3.293 | 3.197 |
| 59 | 3.746 | 3.386 | 3.385 | 3.343 | 3.295 | 3.204 |
| 60 | 3.747 | 3.391 | 3.389 | 3.351 | 3.297 | 3.206 |
| 61 | 3.753 | 3.397 | 3.390 | 3.354 | 3.300 | 3.208 |
| 62 | 3.754 | 3.400 | 3.390 | 3.356 | 3.302 | 3.212 |
| 63 | 3.755 | 3.410 | 3.393 | 3.360 | 3.304 | 3.214 |
| 64 | 3.785 | 3.411 | 3.393 | 3.363 | 3.305 | 3.217 |
| 65 | 3.785 | 3.421 | 3.398 | 3.368 | 3.308 | 3.221 |
| 66 | 3.786 | 3.432 | 3.400 | 3.373 | 3.313 | 3.221 |
| 67 | 3.835 | 3.432 | 3.402 | 3.377 | 3.317 | 3.225 |
| 68 | 3.867 | 3.436 | 3.404 | 3.378 | 3.318 | 3.225 |
| 69 | 3.877 | 3.444 | 3.410 | 3.379 | 3.321 | 3.227 |
| 70 | 3.877 | 3.446 | 3.412 | 3.383 | 3.324 | 3.234 |
| 71 | 3.878 | 3.449 | 3.413 | 3.387 | 3.326 | 3.242 |
| 72 | 3.879 | 3.454 | 3.416 | 3.390 | 3.328 | 3.244 |
| 73 | 3.879 | 3.455 | 3.426 | 3.400 | 3.332 | 3.246 |
| 74 | 3.885 | 3.475 | 3.436 | 3.401 | 3.333 | 3.248 |
| 75 | 3.885 | 3.482 | 3.441 | 3.401 | 3.336 | 3.252 |
| 76 | 3.885 | 3.484 | 3.447 | 3.403 | 3.338 | 3.254 |
| 77 | 3.897 | 3.485 | 3.449 | 3.407 | 3.339 | 3.257 |
| 78 | 3.897 | 3.495 | 3.450 | 3.410 | 3.343 | 3.258 |
| 79 | 3.898 | 3.511 | 3.454 | 3.417 | 3.349 | 3.260 |
| 80 | 3.899 | 3.514 | 3.463 | 3.420 | 3.351 | 3.261 |
| 81 | 3.945 | 3.516 | 3.468 | 3.421 | 3.356 | 3.265 |
| 82 | 3.946 | 3.520 | 3.472 | 3.426 | 3.356 | 3.277 |
| 83 | 3.946 | 3.526 | 3.475 | 3.426 | 3.357 | 3.278 |
| 84 | 3.950 | 3.529 | 3.477 | 3.426 | 3.358 | 3.279 |
| 85 | 3.950 | 3.534 | 3.481 | 3.434 | 3.359 | 3.280 |
| 86 | 3.955 | 3.538 | 3.486 | 3.435 | 3.363 | 3.283 |
| 87 | 3.955 | 3.542 | 3.492 | 3.438 | 3.369 | 3.292 |
| 88 | 3.955 | 3.546 | 3.500 | 3.446 | 3.375 | 3.295 |
| 89 | 3.962 | 3.552 | 3.504 | 3.451 | 3.375 | 3.296 |
| 90 | 3.982 | 3.554 | 3.507 | 3.457 | 3.380 | 3.300 |
| 91 | 3.982 | 3.555 | 3.511 | 3.458 | 3.384 | 3.300 |
| 92 | 3.983 | 3.559 | 3.514 | 3.458 | 3.385 | 3.300 |
| 93 | 3.983 | 3.560 | 3.516 | 3.460 | 3.397 | 3.306 |
| 94 | 3.984 | 3.567 | 3.518 | 3.466 | 3.402 | 3.309 |
| 95 | 3.984 | 3.569 | 3.524 | 3.469 | 3.404 | 3.313 |
| 96 | 3.988 | 3.574 | 3.526 | 3.472 | 3.404 | 3.313 |

**Table S1.** XYZ structure in Å and electronic energy in Hartree of  $[\text{PW}_{12}\text{O}_{40}]^{3-}$ .

E = -4167.33969532

| Atom | X         | Y         | Z         |
|------|-----------|-----------|-----------|
| O    | 0.916365  | 4.393266  | 2.803884  |
| O    | 0.192752  | 0.108915  | 5.285171  |
| O    | 4.443378  | 0.840037  | 2.749629  |
| O    | -2.027634 | -0.092986 | -3.422913 |
| O    | -2.412445 | -2.360000 | -2.110140 |
| O    | -0.162727 | -1.973286 | -3.452516 |
| O    | 1.708319  | -0.097323 | -2.948041 |
| O    | -0.128891 | 1.752939  | -2.917021 |
| O    | -2.894041 | 1.278811  | -1.268264 |
| O    | -3.270060 | -0.952732 | 0.024199  |
| O    | 0.093658  | 0.173725  | -5.286864 |
| O    | -0.980295 | -3.264362 | -0.010617 |
| O    | 1.232734  | -2.879356 | -1.331917 |
| O    | 2.110832  | 2.118009  | -1.635484 |
| O    | -1.373437 | 3.503994  | -1.288987 |
| O    | -2.870667 | 1.263301  | 1.340721  |
| O    | -2.372484 | -2.387262 | 2.124398  |
| O    | 1.260136  | -2.902758 | 1.273937  |
| O    | 3.475311  | -1.379427 | -1.364357 |
| O    | 0.902036  | 3.876692  | 0.015061  |
| O    | -1.348204 | 3.489742  | 1.358277  |
| O    | -4.640651 | -0.638598 | -2.461747 |
| O    | -1.963097 | -0.136936 | 3.459281  |
| O    | -0.097493 | -2.015960 | 3.429542  |
| O    | 3.498909  | -1.397023 | 1.282752  |
| O    | 3.884004  | 0.871016  | -0.031208 |
| O    | 2.141547  | 2.099608  | 1.621904  |
| O    | -0.074879 | 1.717886  | 2.942236  |
| O    | 1.762126  | -0.132291 | 2.911741  |
| O    | -0.647478 | -0.622541 | -1.265994 |
| O    | -0.254886 | 1.530351  | 0.012169  |
| O    | -0.624073 | -0.639130 | 1.269626  |
| O    | -0.714192 | -4.595733 | -2.521680 |
| O    | 1.529429  | -0.267309 | -0.015474 |
| O    | 0.863667  | 4.425165  | -2.767817 |
| O    | -3.866482 | 3.613335  | 0.056621  |
| O    | -4.592651 | -0.671874 | 2.540177  |
| O    | -0.670402 | -4.628568 | 2.477252  |
| O    | 3.580023  | -3.895768 | -0.060183 |
| O    | 4.390051  | 0.876974  | -2.821410 |
| P    | 0.000513  | -0.000447 | -0.000095 |
| W    | 0.506133  | 3.109154  | 1.743879  |

|   |           |           |           |
|---|-----------|-----------|-----------|
| W | -0.036396 | -0.091173 | 3.597657  |
| W | 3.140333  | 0.455303  | 1.702814  |
| W | -0.103007 | -0.048409 | -3.597804 |
| W | -3.042688 | -0.551933 | -1.845213 |
| W | -0.607277 | -3.008193 | -1.881465 |
| W | 0.474070  | 3.129314  | -1.714312 |
| W | -2.465612 | 2.624337  | 0.039732  |
| W | -3.007213 | -0.576357 | 1.894066  |
| W | -0.570527 | -3.032946 | 1.856597  |
| W | 2.604561  | -2.485316 | -0.039502 |
| W | 3.107723  | 0.476035  | -1.755992 |

**Table S2.** XYZ geometries in Å and electronic energies in Hartree of  $M^+(H_2O)_{16}$ .  
 $M = Li$ ,  $E = -1230.52701352$

| Atom | X         | Y         | Z         |
|------|-----------|-----------|-----------|
| Li   | -0.178039 | 0.059748  | -0.060928 |
| O    | 0.867697  | 0.272986  | -1.902650 |
| H    | 1.548319  | 0.967884  | -1.970650 |
| H    | 1.237576  | -0.525467 | -2.314765 |
| O    | 2.643875  | 2.331069  | -1.398822 |
| H    | 3.124953  | 3.018654  | -1.868184 |
| H    | 3.299994  | 1.837674  | -0.847397 |
| O    | -0.694973 | -2.066199 | -0.813597 |
| H    | -0.718253 | -2.620657 | -0.010996 |
| H    | -1.601294 | -2.104565 | -1.174545 |
| O    | 1.545719  | -2.398937 | -2.307660 |
| H    | 1.587298  | -3.067285 | -2.998295 |
| H    | 0.673437  | -2.497940 | -1.862774 |
| O    | 4.070643  | 0.776905  | 0.288148  |
| H    | 3.890911  | -0.151959 | 0.053581  |
| H    | 3.624949  | 0.906732  | 1.145050  |
| O    | -1.800156 | 0.750877  | -1.410717 |
| H    | -1.092352 | 0.760745  | -2.074376 |
| H    | -2.239179 | 1.629442  | -1.460259 |
| O    | -3.335716 | -1.504396 | -1.403068 |
| H    | -2.960683 | -0.605146 | -1.535525 |
| H    | -3.926836 | -1.670549 | -2.143367 |
| O    | 3.225365  | -1.903603 | -0.202046 |
| H    | 3.776137  | -2.642169 | 0.077142  |
| H    | 2.774018  | -2.197346 | -1.023765 |
| O    | -1.564659 | 0.302617  | 1.648498  |
| H    | -1.135760 | 0.227462  | 2.508641  |
| H    | -1.840446 | 1.240972  | 1.592225  |
| O    | -0.879116 | -3.000237 | 1.808569  |
| H    | -0.849669 | -3.876082 | 2.205213  |
| H    | -1.826764 | -2.723379 | 1.795909  |

|   |           |           |           |
|---|-----------|-----------|-----------|
| O | 0.628511  | 2.070053  | 0.504614  |
| H | 1.248680  | 2.409975  | -0.168480 |
| H | 1.181780  | 1.923567  | 1.297336  |
| O | -1.801343 | 3.048158  | 1.183542  |
| H | -1.813444 | 3.695933  | 1.895605  |
| H | -0.855881 | 2.927437  | 0.934257  |
| O | -3.323236 | -1.845066 | 1.428167  |
| H | -2.893180 | -0.975377 | 1.541112  |
| H | -3.517762 | -1.874222 | 0.474595  |
| O | 1.081257  | -1.023421 | 1.308884  |
| H | 0.525700  | -1.739513 | 1.668323  |
| H | 1.827523  | -1.464436 | 0.850300  |
| O | 2.293932  | 1.076127  | 2.494846  |
| H | 1.847496  | 0.210333  | 2.375637  |
| H | 2.416068  | 1.206210  | 3.440168  |
| O | -3.109807 | 3.157087  | -1.234643 |
| H | -2.837614 | 3.894588  | -1.800308 |
| H | -2.725557 | 3.347089  | -0.355142 |

M = Na, E = -1223.18977965

| Atom | X         | Y         | Z         |
|------|-----------|-----------|-----------|
| Na   | -0.151167 | -0.060825 | 0.300497  |
| O    | 1.298360  | 0.139825  | 2.095745  |
| H    | 1.984262  | -0.538475 | 2.215146  |
| H    | 1.726219  | 1.000382  | 2.223003  |
| O    | 2.938884  | -2.100718 | 1.764108  |
| H    | 3.515626  | -2.680856 | 2.269521  |
| H    | 3.484707  | -1.717751 | 1.034444  |
| O    | -0.523937 | 2.379882  | 0.505726  |
| H    | -0.625663 | 2.694777  | -0.412387 |
| H    | -1.393420 | 2.536149  | 0.918552  |
| O    | 1.887355  | 2.853203  | 1.677193  |
| H    | 2.028448  | 3.691298  | 2.127442  |
| H    | 0.973990  | 2.876531  | 1.309993  |
| O    | 4.062571  | -0.896229 | -0.382248 |
| H    | 3.876396  | 0.060270  | -0.333149 |
| H    | 3.526661  | -1.213551 | -1.131767 |
| O    | -2.067648 | -0.373057 | 1.739437  |
| H    | -1.782329 | -0.609181 | 2.628323  |
| H    | -2.722227 | -1.067222 | 1.484820  |
| O    | -3.156871 | 2.087190  | 1.339585  |
| H    | -2.909014 | 1.200868  | 1.684875  |
| H    | -3.785877 | 2.464381  | 1.961778  |
| O    | 3.309267  | 1.843367  | -0.425887 |
| H    | 3.908185  | 2.467802  | -0.847680 |
| H    | 2.933282  | 2.311560  | 0.353422  |

|   |           |           |           |
|---|-----------|-----------|-----------|
| O | -1.641025 | -0.875828 | -1.499951 |
| H | -1.245932 | -0.834287 | -2.377541 |
| H | -1.799664 | -1.827308 | -1.338813 |
| O | -1.023067 | 2.570259  | -2.239214 |
| H | -1.135091 | 3.295750  | -2.860688 |
| H | -1.924279 | 2.200473  | -2.067348 |
| O | 0.700363  | -2.342806 | 0.099389  |
| H | 1.404374  | -2.491563 | 0.758544  |
| H | 1.164080  | -2.317327 | -0.760768 |
| O | -1.699084 | -3.462789 | -0.477555 |
| H | -1.643638 | -4.297919 | -0.951806 |
| H | -0.793308 | -3.266310 | -0.145872 |
| O | -3.313385 | 1.365408  | -1.408375 |
| H | -2.913570 | 0.476858  | -1.350016 |
| H | -3.422579 | 1.657762  | -0.484774 |
| O | 1.056457  | 0.782186  | -1.661533 |
| H | 0.453454  | 1.427203  | -2.074464 |
| H | 1.831700  | 1.289469  | -1.346728 |
| O | 2.051750  | -1.661220 | -2.246077 |
| H | 1.642572  | -0.770177 | -2.311080 |
| H | 2.096613  | -2.015996 | -3.139090 |
| O | -3.798599 | -2.267111 | 0.835530  |
| H | -4.275526 | -2.773278 | 1.500662  |
| H | -3.166760 | -2.893751 | 0.431000  |

M = K, E = -1251.12888467

| Atom | X         | Y         | Z         |
|------|-----------|-----------|-----------|
| K    | 0.000000  | 0.000000  | 0.000000  |
| O    | 2.766141  | 0.137746  | 0.554143  |
| H    | 3.074735  | -0.750847 | 0.325229  |
| H    | 3.370375  | 0.762361  | 0.129364  |
| O    | 2.224036  | -2.512496 | -0.142607 |
| H    | 2.591202  | -3.380002 | -0.336981 |
| H    | 1.986423  | -2.117095 | -1.008699 |
| O    | 1.089530  | 2.550283  | 1.027476  |
| H    | 0.537676  | 3.302366  | 1.265072  |
| H    | 1.258109  | 2.074845  | 1.866664  |
| O    | 3.351992  | 2.699021  | -0.475890 |
| H    | 3.887219  | 3.497035  | -0.435883 |
| H    | 2.591555  | 2.838782  | 0.132608  |
| O    | 1.562782  | -1.012998 | -2.361799 |
| H    | 1.866789  | -0.092243 | -2.478161 |
| H    | 0.738483  | -1.069924 | -2.877477 |
| O    | 0.840695  | -1.640548 | 2.198539  |
| H    | 1.258893  | -2.160412 | 1.490511  |
| H    | -0.062492 | -1.978084 | 2.335678  |



|   |           |           |           |
|---|-----------|-----------|-----------|
| O | 1.094981  | 0.880799  | 3.250629  |
| H | 1.237790  | -0.037511 | 2.936199  |
| H | 1.535215  | 0.951965  | 4.102869  |
| O | 1.940217  | 1.779315  | -2.622988 |
| H | 2.251371  | 2.097738  | -3.476687 |
| H | 2.526046  | 2.200787  | -1.953900 |
| O | -2.766141 | -0.137746 | -0.554143 |
| H | -3.074735 | 0.750847  | -0.325229 |
| H | -3.370375 | -0.762361 | -0.129364 |
| O | -2.224036 | 2.512496  | 0.142607  |
| H | -2.591202 | 3.380002  | 0.336981  |
| H | -1.986423 | 2.117095  | 1.008699  |
| O | -1.089530 | -2.550283 | -1.027476 |
| H | -0.537676 | -3.302366 | -1.265072 |
| H | -1.258109 | -2.074845 | -1.866664 |
| O | -3.351992 | -2.699021 | 0.475890  |
| H | -3.887219 | -3.497035 | 0.435883  |
| H | -2.591555 | -2.838782 | -0.132608 |
| O | -1.562782 | 1.012998  | 2.361799  |
| H | -1.866789 | 0.092243  | 2.478161  |
| H | -0.738483 | 1.069924  | 2.877477  |
| O | -0.840695 | 1.640548  | -2.198539 |
| H | -1.258893 | 2.160412  | -1.490511 |
| H | 0.062492  | 1.978084  | -2.335678 |
| O | -1.094981 | -0.880799 | -3.250629 |
| H | -1.237790 | 0.037511  | -2.936199 |
| H | -1.535215 | -0.951965 | -4.102869 |
| O | -1.940217 | -1.779315 | 2.622988  |
| H | -2.251371 | -2.097738 | 3.476687  |
| H | -2.526046 | -2.200787 | 1.953900  |

M = Rb, E = -1246.83520609

| Atom | X        | Y         | Z         |
|------|----------|-----------|-----------|
| Rb   | 0.000000 | 0.000000  | 0.000000  |
| O    | 2.928851 | 0.113943  | 0.652665  |
| H    | 3.206036 | -0.767684 | 0.365273  |
| H    | 3.487572 | 0.749257  | 0.182393  |
| O    | 2.285087 | -2.517078 | -0.149241 |
| H    | 2.626084 | -3.401721 | -0.312247 |
| H    | 2.065195 | -2.148022 | -1.032402 |
| O    | 1.216672 | 2.619280  | 1.112579  |
| H    | 0.700451 | 3.381238  | 1.394476  |
| H    | 1.335303 | 2.072251  | 1.916041  |
| O    | 3.410716 | 2.637231  | -0.485515 |
| H    | 3.969490 | 3.417628  | -0.547706 |
| H    | 2.709260 | 2.841716  | 0.171835  |

|   |           |           |           |
|---|-----------|-----------|-----------|
| O | 1.670715  | -1.134942 | -2.452154 |
| H | 1.936612  | -0.197061 | -2.496820 |
| H | 0.803805  | -1.148145 | -2.896663 |
| O | 1.044181  | -1.831937 | 2.345512  |
| H | 1.433606  | -2.223635 | 1.543750  |
| H | 0.098686  | -2.065004 | 2.349287  |
| O | 1.040908  | 0.787425  | 3.202928  |
| H | 1.235873  | -0.134247 | 2.919559  |
| H | 1.437968  | 0.887107  | 4.073738  |
| O | 1.796172  | 1.701129  | -2.481861 |
| H | 2.072331  | 2.021473  | -3.347555 |
| H | 2.427585  | 2.110881  | -1.845526 |
| O | -2.928851 | -0.113943 | -0.652665 |
| H | -3.206036 | 0.767684  | -0.365273 |
| H | -3.487572 | -0.749257 | -0.182393 |
| O | -2.285087 | 2.517078  | 0.149241  |
| H | -2.626084 | 3.401721  | 0.312247  |
| H | -2.065195 | 2.148022  | 1.032402  |
| O | -1.216672 | -2.619280 | -1.112579 |
| H | -0.700451 | -3.381238 | -1.394476 |
| H | -1.335303 | -2.072251 | -1.916041 |
| O | -3.410716 | -2.637231 | 0.485515  |
| H | -3.969490 | -3.417628 | 0.547706  |
| H | -2.709260 | -2.841716 | -0.171835 |
| O | -1.670715 | 1.134942  | 2.452154  |
| H | -1.936612 | 0.197061  | 2.496820  |
| H | -0.803805 | 1.148145  | 2.896663  |
| O | -1.044181 | 1.831937  | -2.345512 |
| H | -1.433606 | 2.223635  | -1.543750 |
| H | -0.098686 | 2.065004  | -2.349287 |
| O | -1.040908 | -0.787425 | -3.202928 |
| H | -1.235873 | 0.134247  | -2.919559 |
| H | -1.437968 | -0.887107 | -4.073738 |
| O | -1.796172 | -1.701129 | 2.481861  |
| H | -2.072331 | -2.021473 | 3.347555  |
| H | -2.427585 | -2.110881 | 1.845526  |

M = Cs, E = -1242.82678372

| Atom | X        | Y         | Z         |
|------|----------|-----------|-----------|
| Cs   | 0.000000 | 0.000000  | 0.000000  |
| O    | 3.256984 | 0.043261  | 0.653769  |
| H    | 3.691604 | -0.797065 | 0.441975  |
| H    | 3.745908 | 0.727680  | 0.176295  |
| O    | 3.509406 | -2.663860 | 0.043550  |
| H    | 4.086271 | -3.417767 | -0.108411 |
| H    | 3.056886 | -2.473332 | -0.808908 |

|   |           |           |           |
|---|-----------|-----------|-----------|
| O | 1.658896  | 2.479171  | 1.528273  |
| H | 1.351350  | 3.220406  | 2.058042  |
| H | 1.753489  | 1.728913  | 2.155331  |
| O | 3.451853  | 2.570404  | -0.525960 |
| H | 3.890534  | 3.412376  | -0.677322 |
| H | 2.843553  | 2.702140  | 0.235812  |
| O | 2.058708  | -1.737161 | -2.064200 |
| H | 2.230721  | -0.792782 | -2.263529 |
| H | 2.031884  | -2.179425 | -2.918026 |
| O | 1.558205  | -2.176971 | 1.962368  |
| H | 2.277281  | -2.477950 | 1.370402  |
| H | 1.318192  | -2.945932 | 2.487724  |
| O | 1.454534  | 0.305457  | 3.253892  |
| H | 1.667421  | -0.554045 | 2.834958  |
| H | 1.976204  | 0.327054  | 4.061641  |
| O | 2.130102  | 1.008783  | -2.383856 |
| H | 2.064692  | 1.415303  | -3.252946 |
| H | 2.637963  | 1.639812  | -1.831810 |
| O | -3.256984 | -0.043261 | -0.653769 |
| H | -3.691604 | 0.797065  | -0.441975 |
| H | -3.745908 | -0.727680 | -0.176295 |
| O | -3.509406 | 2.663860  | -0.043550 |
| H | -4.086271 | 3.417767  | 0.108411  |
| H | -3.056886 | 2.473332  | 0.808908  |
| O | -1.658896 | -2.479171 | -1.528273 |
| H | -1.351350 | -3.220406 | -2.058042 |
| H | -1.753489 | -1.728913 | -2.155331 |
| O | -3.451853 | -2.570404 | 0.525960  |
| H | -3.890534 | -3.412376 | 0.677322  |
| H | -2.843553 | -2.702140 | -0.235812 |
| O | -2.058708 | 1.737161  | 2.064200  |
| H | -2.230721 | 0.792782  | 2.263529  |
| H | -2.031884 | 2.179425  | 2.918026  |
| O | -1.558205 | 2.176971  | -1.962368 |
| H | -2.277281 | 2.477950  | -1.370402 |
| H | -1.318192 | 2.945932  | -2.487724 |
| O | -1.454534 | -0.305457 | -3.253892 |
| H | -1.667421 | 0.554045  | -2.834958 |
| H | -1.976204 | -0.327054 | -4.061641 |
| O | -2.130102 | -1.008783 | 2.383856  |
| H | -2.064692 | -1.415303 | 3.252946  |
| H | -2.637963 | -1.639812 | 1.831810  |

**Table S3.** XYZ geometries in Å and electronic energies in Hartree of  $[\text{PW}_{12}\text{O}_{40}]^3-[\text{M}^+(\text{H}_2\text{O})_{16}]_3$ .  
M = Li, E = -7858.97536612

| Atom | X         | Y         | Z         |
|------|-----------|-----------|-----------|
| O    | -4.140484 | 1.973400  | -2.714222 |
| O    | -1.056903 | -1.266572 | -4.986584 |
| O    | -4.479107 | -2.889871 | -1.747616 |
| O    | 1.634255  | 1.544994  | 3.124694  |
| O    | 3.252912  | -0.185976 | 1.935414  |
| O    | 1.414354  | -1.036385 | 3.669329  |
| O    | -1.255659 | -0.851210 | 3.367082  |
| O    | -1.043514 | 1.693392  | 2.844734  |
| O    | 1.197468  | 2.736718  | 0.732409  |
| O    | 2.781050  | 1.000271  | -0.417102 |
| O    | 0.022642  | 0.790732  | 5.332827  |
| O    | 2.487204  | -2.120763 | 0.236830  |
| O    | 0.722513  | -2.983299 | 1.941143  |
| O    | -3.128458 | 0.349344  | 1.975159  |
| O    | -1.374748 | 3.502612  | 0.869221  |
| O    | 0.911446  | 2.189886  | -1.798895 |
| O    | 2.817499  | -1.017501 | -2.192119 |
| O    | 0.446684  | -3.502002 | -0.609695 |
| O    | -1.938624 | -3.223964 | 2.279367  |
| O    | -3.464954 | 2.141341  | 0.015497  |
| O    | -1.658438 | 2.971418  | -1.715289 |
| O    | 3.868135  | 2.580006  | 1.699055  |
| O    | 0.936435  | 0.202425  | -3.601665 |
| O    | 0.710643  | -2.376996 | -3.056079 |
| O    | -2.203237 | -3.750653 | -0.293084 |
| O    | -3.819138 | -1.991236 | 0.866414  |
| O    | -3.427818 | -0.295984 | -1.146786 |
| O    | -1.654320 | 0.543670  | -2.874240 |
| O    | -1.835940 | -1.999919 | -2.325795 |
| O    | 0.699355  | -0.098946 | 1.327573  |
| O    | -1.100075 | 1.054238  | -0.021343 |
| O    | 0.452611  | -0.600109 | -1.151887 |
| O    | 3.435639  | -2.852372 | 2.830543  |
| O    | -1.292869 | -1.425542 | 0.485755  |
| O    | -3.522597 | 3.091378  | 2.687383  |
| O    | 0.317203  | 4.862393  | -0.966180 |
| O    | 3.362649  | 1.636508  | -3.109361 |
| O    | 2.912800  | -3.833431 | -2.007233 |
| O    | -0.477903 | -5.451434 | 1.238295  |
| O    | -3.939137 | -1.787091 | 3.686879  |
| P    | -0.308810 | -0.267712 | 0.160162  |
| W    | -2.872302 | 1.459945  | -1.684518 |
| W    | -0.581536 | -0.963112 | -3.372011 |

|    |            |           |           |
|----|------------|-----------|-----------|
| W  | -3.130646  | -2.197366 | -0.935668 |
| W  | 0.152951   | 0.431242  | 3.665473  |
| W  | 2.535906   | 1.544266  | 1.414602  |
| W  | 2.259154   | -1.825797 | 2.129177  |
| W  | -2.498440  | 2.156919  | 1.684145  |
| W  | -0.127059  | 3.248631  | -0.580055 |
| W  | 2.159651   | 0.788381  | -2.220153 |
| W  | 1.860773   | -2.569421 | -1.526247 |
| W  | -0.683904  | -3.774286 | 0.919684  |
| W  | -2.805943  | -1.502113 | 2.437001  |
| Li | -9.592898  | 0.917297  | -0.518481 |
| O  | -8.229569  | 1.203624  | -2.174046 |
| H  | -7.849840  | 2.091643  | -2.315151 |
| H  | -7.500761  | 0.568608  | -2.269930 |
| O  | -7.501471  | 3.853219  | -2.012641 |
| H  | -7.134239  | 4.523645  | -2.595717 |
| H  | -6.896044  | 3.777385  | -1.231581 |
| O  | -9.159015  | -1.247696 | -0.672756 |
| H  | -9.193439  | -1.603825 | 0.235656  |
| H  | -9.856247  | -1.727456 | -1.160435 |
| O  | -6.624244  | -0.978502 | -1.644368 |
| H  | -6.080754  | -1.744854 | -1.877971 |
| H  | -7.487974  | -1.319154 | -1.325532 |
| O  | -6.165364  | 3.397768  | 0.264053  |
| H  | -5.860569  | 2.471685  | 0.292032  |
| H  | -6.842505  | 3.462324  | 0.961775  |
| O  | -10.926238 | 0.669070  | -2.303138 |
| H  | -10.106861 | 0.852026  | -2.790154 |
| H  | -11.611355 | 1.272677  | -2.667178 |
| O  | -11.527748 | -1.957317 | -1.904038 |
| H  | -11.456628 | -1.032458 | -2.231739 |
| H  | -11.749958 | -2.503942 | -2.663508 |
| O  | -5.874152  | 0.525071  | 0.542878  |
| H  | -5.020405  | 0.260649  | 0.915905  |
| H  | -5.988412  | -0.028029 | -0.261844 |
| O  | -11.363286 | 0.930431  | 0.752046  |
| H  | -11.163672 | 1.196611  | 1.657054  |
| H  | -11.920608 | 1.655556  | 0.400355  |
| O  | -9.719134  | -1.703353 | 2.021397  |
| H  | -9.480017  | -2.421754 | 2.614913  |
| H  | -10.654461 | -1.858594 | 1.749469  |
| O  | -9.718445  | 3.170533  | -0.451721 |
| H  | -9.114643  | 3.596522  | -1.088282 |
| H  | -9.386674  | 3.444959  | 0.426193  |
| O  | -12.419992 | 3.208330  | -0.473393 |
| H  | -12.840780 | 3.921385  | 0.017726  |

|    |            |           |           |
|----|------------|-----------|-----------|
| H  | -11.462185 | 3.433894  | -0.524732 |
| O  | -12.199236 | -1.727804 | 0.863315  |
| H  | -12.121363 | -0.755936 | 0.800941  |
| H  | -12.099146 | -2.015429 | -0.061115 |
| O  | -8.459830  | 0.762281  | 1.388306  |
| H  | -8.828159  | -0.026026 | 1.826230  |
| H  | -7.508308  | 0.568285  | 1.243706  |
| O  | -8.425773  | 3.385034  | 1.992382  |
| H  | -8.494215  | 2.409796  | 2.084214  |
| H  | -8.578061  | 3.764395  | 2.863216  |
| O  | -12.991649 | 2.337357  | -3.019191 |
| H  | -12.844911 | 3.005254  | -3.695892 |
| H  | -12.948383 | 2.816432  | -2.166721 |
| Li | 5.908070   | 6.957891  | -0.627589 |
| O  | 7.228900   | 6.435428  | -2.134575 |
| H  | 7.760408   | 7.115381  | -2.583561 |
| H  | 7.813890   | 5.675325  | -1.989062 |
| O  | 8.411172   | 8.830772  | -2.916467 |
| H  | 8.852532   | 9.239879  | -3.666170 |
| H  | 9.018751   | 8.909905  | -2.140595 |
| O  | 5.952320   | 4.730852  | -0.003036 |
| H  | 5.779826   | 4.767767  | 0.956379  |
| H  | 5.175859   | 4.270489  | -0.385631 |
| O  | 8.460145   | 4.259474  | -0.853064 |
| H  | 8.739245   | 3.351351  | -1.002308 |
| H  | 7.546492   | 4.223432  | -0.480650 |
| O  | 9.721277   | 8.871253  | -0.558318 |
| H  | 9.783462   | 7.956979  | -0.225298 |
| H  | 9.089761   | 9.311326  | 0.039790  |
| O  | 4.226920   | 6.570957  | -1.929791 |
| H  | 4.404595   | 6.896529  | -2.818040 |
| H  | 3.357564   | 6.943852  | -1.661847 |
| O  | 3.628943   | 3.984199  | -1.257764 |
| H  | 3.762857   | 4.830960  | -1.732544 |
| H  | 3.634740   | 3.299008  | -1.941027 |
| O  | 9.635922   | 6.258424  | 0.581360  |
| H  | 10.315132  | 5.985935  | 1.206538  |
| H  | 9.386897   | 5.450547  | 0.078910  |
| O  | 4.334125   | 7.776545  | 0.736488  |
| H  | 4.604134   | 8.157504  | 1.578130  |
| H  | 3.880603   | 8.498689  | 0.260335  |
| O  | 5.187691   | 5.490515  | 2.575753  |
| H  | 5.196954   | 4.851352  | 3.294986  |
| H  | 4.277110   | 5.448567  | 2.191394  |
| O  | 6.111662   | 9.084357  | -1.326223 |
| H  | 6.774771   | 9.153829  | -2.037550 |

|    |          |           |           |
|----|----------|-----------|-----------|
| H  | 6.519721 | 9.541854  | -0.565705 |
| O  | 3.414140 | 9.646009  | -1.167499 |
| H  | 3.263973 | 10.576965 | -0.975735 |
| H  | 4.357903 | 9.586278  | -1.426572 |
| O  | 2.775367 | 5.389903  | 1.271882  |
| H  | 2.815700 | 6.227224  | 0.779324  |
| H  | 2.774155 | 4.702120  | 0.588018  |
| O  | 7.105490 | 7.155819  | 1.246143  |
| H  | 6.588927 | 6.626473  | 1.879074  |
| H  | 7.998459 | 6.756198  | 1.203426  |
| O  | 7.519500 | 9.803682  | 0.977490  |
| H  | 7.308015 | 8.921888  | 1.355944  |
| H  | 7.426080 | 10.446201 | 1.687153  |
| O  | 1.854145 | 7.267664  | -0.819434 |
| H  | 1.096793 | 6.705596  | -1.039557 |
| H  | 1.634720 | 8.173975  | -1.066020 |
| Li | 5.698858 | -6.006465 | -0.591984 |
| O  | 6.210523 | -4.181980 | -1.634544 |
| H  | 5.953147 | -3.331066 | -1.237306 |
| H  | 7.151865 | -4.098979 | -1.861163 |
| O  | 5.368342 | -2.099036 | -0.007631 |
| H  | 4.779143 | -1.347291 | 0.122024  |
| H  | 5.902566 | -2.203720 | 0.816351  |
| O  | 7.420419 | -6.946685 | -1.710934 |
| H  | 7.756452 | -7.659780 | -1.135038 |
| H  | 7.125284 | -7.399098 | -2.524771 |
| O  | 8.953051 | -4.718014 | -1.834980 |
| H  | 9.670054 | -4.646940 | -2.472289 |
| H  | 8.583285 | -5.626664 | -1.917938 |
| O  | 6.886521 | -2.839615 | 2.100413  |
| H  | 7.631317 | -3.301624 | 1.672903  |
| H  | 6.404791 | -3.540508 | 2.576454  |
| O  | 4.523625 | -6.251071 | -2.466356 |
| H  | 4.743778 | -5.320541 | -2.625514 |
| H  | 3.545986 | -6.306674 | -2.549424 |
| O  | 5.927292 | -8.226738 | -3.651475 |
| H  | 5.304994 | -7.490529 | -3.451353 |
| H  | 5.941747 | -8.333599 | -4.607047 |
| O  | 8.940038 | -4.407685 | 0.884587  |
| H  | 9.804006 | -4.417496 | 1.309277  |
| H  | 9.113499 | -4.423217 | -0.082502 |
| O  | 4.521835 | -7.736774 | 0.234111  |
| H  | 4.730369 | -7.941350 | 1.152534  |
| H  | 3.592558 | -7.429228 | 0.252344  |
| O  | 7.699023 | -8.980543 | 0.174881  |
| H  | 8.398203 | -9.617535 | 0.349778  |

|   |          |           |           |
|---|----------|-----------|-----------|
| H | 6.991660 | -9.461153 | -0.318868 |
| O | 4.324215 | -4.731602 | 0.556712  |
| H | 4.434147 | -3.788515 | 0.330452  |
| H | 4.531459 | -4.785258 | 1.510350  |
| O | 2.137816 | -6.295596 | 0.107874  |
| H | 1.363936 | -6.173822 | 0.677352  |
| H | 2.737298 | -5.533160 | 0.270713  |
| O | 5.563505 | -9.812654 | -1.308272 |
| H | 5.007191 | -9.146357 | -0.859306 |
| H | 5.682859 | -9.455976 | -2.206547 |
| O | 7.044424 | -6.405421 | 1.146292  |
| H | 7.363851 | -7.318737 | 1.033457  |
| H | 7.838365 | -5.831853 | 1.121646  |
| O | 5.548973 | -5.177902 | 3.024968  |
| H | 6.116117 | -5.847781 | 2.588913  |
| H | 5.293417 | -5.529677 | 3.882773  |
| O | 1.760008 | -6.606169 | -2.594498 |
| H | 1.358572 | -5.837208 | -3.012624 |
| H | 1.708891 | -6.423344 | -1.632074 |

M = Na, E = -7836.94948216

| Atom | X         | Y         | Z         |
|------|-----------|-----------|-----------|
| O    | 0.805438  | -4.547118 | -2.918626 |
| O    | -0.555147 | -0.285021 | -5.090998 |
| O    | 4.042565  | -0.781439 | -3.162104 |
| O    | -1.597747 | -0.513260 | 3.826922  |
| O    | -2.325730 | 1.758278  | 2.673926  |
| O    | 0.107647  | 1.510745  | 3.685370  |
| O    | 2.021381  | -0.192074 | 2.857831  |
| O    | 0.345436  | -2.183652 | 3.000748  |
| O    | -2.647800 | -1.884533 | 1.750847  |
| O    | -3.340874 | 0.355482  | 0.609621  |
| O    | 0.772169  | -0.660186 | 5.384014  |
| O    | -1.260945 | 2.834053  | 0.438633  |
| O    | 1.138682  | 2.626536  | 1.440962  |
| O    | 2.423806  | -2.337772 | 1.420085  |
| O    | -0.966832 | -3.978054 | 1.486480  |
| O    | -2.949056 | -1.786710 | -0.838927 |
| O    | -2.850013 | 1.905196  | -1.528300 |
| O    | 0.806706  | 2.677326  | -1.142941 |
| O    | 3.458152  | 1.275362  | 1.122864  |
| O    | 1.135754  | -4.133095 | -0.116778 |
| O    | -1.296744 | -3.892550 | -1.138540 |
| O    | -4.348390 | -0.157073 | 3.227642  |
| O    | -2.460666 | -0.255217 | -2.993681 |
| O    | -0.747124 | 1.759039  | -3.128587 |



|    |           |           |           |
|----|-----------|-----------|-----------|
| O  | 3.135989  | 1.364264  | -1.511334 |
| O  | 3.854572  | -0.895414 | -0.343471 |
| O  | 2.010324  | -2.213121 | -1.786627 |
| O  | -0.387812 | -1.963486 | -2.783957 |
| O  | 1.301942  | 0.016760  | -2.946245 |
| O  | -0.567063 | 0.190028  | 1.535073  |
| O  | -0.170363 | -1.886168 | 0.136545  |
| O  | -0.884690 | 0.280754  | -0.976955 |
| O  | -0.764118 | 4.107279  | 2.945476  |
| O  | 1.443514  | 0.061416  | -0.001066 |
| O  | 1.528442  | -4.764497 | 2.605429  |
| O  | -3.615431 | -4.226153 | 0.480911  |
| O  | -4.976885 | 0.018976  | -1.711026 |
| O  | -1.395227 | 4.292325  | -2.000131 |
| O  | 3.210981  | 3.817062  | -0.093321 |
| O  | 4.732615  | -0.928757 | 2.355045  |
| P  | -0.045896 | -0.340055 | 0.172720  |
| W  | 0.456779  | -3.350219 | -1.748736 |
| W  | -0.571687 | -0.149063 | -3.386211 |
| W  | 2.857440  | -0.498370 | -1.950406 |
| W  | 0.329908  | -0.407960 | 3.750849  |
| W  | -2.841104 | -0.081936 | 2.415449  |
| W  | -0.619787 | 2.556798  | 2.236139  |
| W  | 0.888136  | -3.465734 | 1.679010  |
| W  | -2.284093 | -3.157269 | 0.344162  |
| W  | -3.312298 | 0.040132  | -1.286575 |
| W  | -1.089193 | 2.684377  | -1.470164 |
| W  | 2.350289  | 2.337681  | -0.043190 |
| W  | 3.291545  | -0.617669 | 1.480426  |
| Na | 7.647009  | -4.878690 | -0.081004 |
| O  | 6.507392  | -6.607106 | 0.992742  |
| H  | 5.562202  | -6.448590 | 1.162568  |
| H  | 6.577767  | -7.485312 | 0.589209  |
| O  | 3.954884  | -5.512253 | 1.158520  |
| H  | 3.144964  | -5.524964 | 1.685881  |
| H  | 3.691954  | -5.636337 | 0.216075  |
| O  | 9.282885  | -6.628352 | -0.719852 |
| H  | 9.624853  | -6.260478 | -1.555137 |
| H  | 10.041069 | -6.607250 | -0.106227 |
| O  | 7.443635  | -8.633784 | -0.727569 |
| H  | 7.761011  | -9.541715 | -0.727898 |
| H  | 8.239141  | -8.055223 | -0.766107 |
| O  | 3.701407  | -5.762164 | -1.536331 |
| H  | 4.367920  | -6.393273 | -1.864035 |
| H  | 3.970247  | -4.902280 | -1.907144 |
| O  | 8.970528  | -4.502343 | 1.904828  |

|    |            |           |           |
|----|------------|-----------|-----------|
| H  | 8.513754   | -4.671706 | 2.735018  |
| H  | 9.278780   | -3.567496 | 1.950089  |
| O  | 11.198654  | -5.853191 | 1.138773  |
| H  | 10.468196  | -5.459892 | 1.664705  |
| H  | 11.816465  | -6.243029 | 1.764509  |
| O  | 5.758672   | -7.480039 | -2.540883 |
| H  | 5.572344   | -8.009289 | -3.322778 |
| H  | 6.302630   | -8.047539 | -1.949692 |
| O  | 8.538255   | -2.816691 | -1.013828 |
| H  | 8.530044   | -2.752437 | -1.974282 |
| H  | 8.088861   | -2.016684 | -0.695530 |
| O  | 9.985952   | -4.827629 | -2.769143 |
| H  | 10.578692  | -4.942729 | -3.518227 |
| H  | 10.503289  | -4.338002 | -2.083370 |
| O  | 5.718559   | -3.476619 | 0.397312  |
| H  | 5.013043   | -3.978759 | 0.847841  |
| H  | 5.353804   | -3.265657 | -0.485467 |
| O  | 7.225170   | -1.237118 | 0.842911  |
| H  | 6.745191   | -0.485269 | 1.206340  |
| H  | 6.588808   | -1.985108 | 0.891177  |
| O  | 11.310675  | -3.649397 | -0.660528 |
| H  | 10.620590  | -3.089573 | -0.268718 |
| H  | 11.453148  | -4.362652 | -0.011786 |
| O  | 7.166087   | -5.109150 | -2.428268 |
| H  | 8.055916   | -5.063374 | -2.815993 |
| H  | 6.789841   | -5.980953 | -2.662816 |
| O  | 5.063318   | -3.387889 | -2.318880 |
| H  | 5.892296   | -3.838547 | -2.583339 |
| H  | 4.954728   | -2.614016 | -2.887853 |
| O  | 9.804397   | -1.949292 | 1.552581  |
| H  | 10.215785  | -1.445559 | 2.261950  |
| H  | 8.927450   | -1.537166 | 1.403894  |
| Na | -9.318697  | -2.095098 | -0.133270 |
| O  | -11.233520 | -3.098496 | 0.741675  |
| H  | -11.834950 | -2.519610 | 1.241645  |
| H  | -11.770689 | -3.529143 | 0.057862  |
| O  | -12.472090 | -0.949376 | 2.033412  |
| H  | -13.134572 | -0.820470 | 2.718181  |
| H  | -12.807473 | -0.494456 | 1.221856  |
| O  | -9.336786  | -3.798170 | -1.906177 |
| H  | -8.919025  | -3.291745 | -2.628523 |
| H  | -8.716569  | -4.525504 | -1.718239 |
| O  | -12.037682 | -4.111109 | -1.777774 |
| H  | -12.398153 | -4.930556 | -2.129846 |
| H  | -11.069118 | -4.132658 | -1.954838 |
| O  | -13.039056 | 0.232943  | -0.333421 |

|    |            |           |           |
|----|------------|-----------|-----------|
| H  | -13.017104 | -0.414408 | -1.063371 |
| H  | -12.254822 | 0.795279  | -0.473968 |
| O  | -7.913143  | -3.588978 | 1.100949  |
| H  | -8.228975  | -3.853419 | 1.970918  |
| H  | -7.055743  | -3.128499 | 1.254459  |
| O  | -7.208754  | -5.292834 | -0.889751 |
| H  | -7.447184  | -4.925533 | -0.011145 |
| H  | -6.874174  | -6.182311 | -0.740064 |
| O  | -12.748731 | -1.573874 | -2.514320 |
| H  | -13.314820 | -1.509575 | -3.289700 |
| H  | -12.642587 | -2.533911 | -2.331365 |
| O  | -7.630881  | -0.382557 | -0.597277 |
| H  | -6.851687  | -0.363626 | -1.170076 |
| H  | -7.312922  | 0.012004  | 0.229983  |
| O  | -7.839791  | -1.926329 | -3.340272 |
| H  | -7.522227  | -1.935849 | -4.248258 |
| H  | -7.070568  | -2.188584 | -2.779138 |
| O  | -9.777460  | -0.294663 | 1.515751  |
| H  | -10.629274 | -0.473909 | 1.953400  |
| H  | -9.966784  | 0.453161  | 0.914367  |
| O  | -7.138934  | 0.037053  | 2.140719  |
| H  | -6.821091  | 0.563674  | 2.880158  |
| H  | -8.112692  | -0.039395 | 2.221865  |
| O  | -5.881770  | -2.924128 | -1.708706 |
| H  | -5.679323  | -2.486936 | -0.865323 |
| H  | -6.180638  | -3.817644 | -1.456295 |
| O  | -10.125686 | -0.811980 | -2.038806 |
| H  | -9.386534  | -0.995192 | -2.644054 |
| H  | -10.952328 | -1.057183 | -2.493231 |
| O  | -10.487600 | 1.422471  | -0.563809 |
| H  | -10.174820 | 0.763705  | -1.224873 |
| H  | -10.142535 | 2.277477  | -0.837579 |
| O  | -5.662046  | -2.088195 | 1.158177  |
| H  | -4.898693  | -2.352923 | 1.685969  |
| H  | -6.038020  | -1.299428 | 1.603453  |
| Na | 2.360566   | 9.293193  | -0.123461 |
| O  | 1.506384   | 8.497833  | 1.935512  |
| H  | 0.736895   | 8.979324  | 2.284257  |
| H  | 1.283359   | 7.554145  | 1.964636  |
| O  | -0.592767  | 10.317856 | 2.313588  |
| H  | -1.106398  | 10.632646 | 3.063203  |
| H  | -1.227676  | 9.868020  | 1.704183  |
| O  | 3.144625   | 7.003147  | -0.374810 |
| H  | 3.083530   | 6.866592  | -1.337081 |
| H  | 4.086779   | 6.871237  | -0.167226 |
| O  | 1.287791   | 5.776800  | 1.212958  |

|   |           |           |           |
|---|-----------|-----------|-----------|
| H | 1.430589  | 4.879399  | 1.537663  |
| H | 2.043904  | 5.986423  | 0.620132  |
| O | -2.046383 | 9.051854  | 0.400908  |
| H | -1.702742 | 8.157657  | 0.217592  |
| H | -1.792148 | 9.583933  | -0.375103 |
| O | 4.500761  | 9.755892  | 0.883287  |
| H | 4.466746  | 10.071987 | 1.791999  |
| H | 4.957212  | 10.457462 | 0.370789  |
| O | 5.842393  | 7.510507  | 0.095543  |
| H | 5.528268  | 8.285504  | 0.608358  |
| H | 6.620163  | 7.171437  | 0.548829  |
| O | -0.871704 | 6.538782  | -0.283092 |
| H | -1.218808 | 5.824611  | -0.840098 |
| H | -0.191543 | 6.123511  | 0.292199  |
| O | 2.588901  | 10.457273 | -2.201548 |
| H | 2.867903  | 10.177757 | -3.078367 |
| H | 2.775052  | 11.407811 | -2.149141 |
| O | 3.066669  | 7.578240  | -3.123090 |
| H | 3.224527  | 7.035216  | -3.901465 |
| H | 3.912973  | 8.053944  | -2.946182 |
| O | 1.132833  | 11.307624 | 0.303772  |
| H | 0.623343  | 11.217514 | 1.129404  |
| H | 0.453834  | 11.253494 | -0.399144 |
| O | 3.052994  | 12.872767 | -0.880804 |
| H | 2.885294  | 13.816745 | -0.954823 |
| H | 2.361141  | 12.510461 | -0.286323 |
| O | 5.402208  | 8.840921  | -2.377542 |
| H | 5.322102  | 9.753209  | -2.049317 |
| H | 5.720947  | 8.334853  | -1.607549 |
| O | 0.701232  | 8.350875  | -1.652344 |
| H | 1.317019  | 8.037737  | -2.334582 |
| H | 0.187408  | 7.581290  | -1.333013 |
| O | -0.776429 | 10.594950 | -1.605750 |
| H | -0.218856 | 9.832264  | -1.884391 |
| H | -1.066679 | 11.035793 | -2.409942 |
| O | 5.428449  | 11.455696 | -1.031641 |
| H | 6.240086  | 11.971878 | -0.996540 |
| H | 4.692951  | 12.102409 | -1.009436 |

M = K, E = -7920.78833242

| Atom | X         | Y         | Z         |
|------|-----------|-----------|-----------|
| O    | -3.809523 | 2.122724  | 2.676655  |
| O    | -0.816945 | -1.110252 | 5.065636  |
| O    | 0.832578  | 3.470044  | 3.920433  |
| O    | 0.092954  | -0.936643 | -3.880627 |
| O    | 1.676103  | -2.635076 | -2.616650 |

|   |           |           |           |
|---|-----------|-----------|-----------|
| O | 2.548598  | -0.210107 | -3.228756 |
| O | 1.578070  | 2.128831  | -2.270614 |
| O | -0.840369 | 1.389522  | -2.913335 |
| O | -1.899287 | -1.551625 | -2.161073 |
| O | -0.317451 | -3.217613 | -0.926006 |
| O | 1.109340  | 1.471644  | -5.004451 |
| O | 2.711263  | -2.360317 | -0.130180 |
| O | 3.517778  | 0.048169  | -0.744952 |
| O | -0.478164 | 3.165426  | -1.023944 |
| O | -3.238384 | 0.744472  | -1.847948 |
| O | -2.378339 | -2.211213 | 0.321686  |
| O | 0.930261  | -3.646199 | 1.430330  |
| O | 3.059455  | -0.567601 | 1.742700  |
| O | 3.153362  | 2.658816  | -0.174240 |
| O | -2.850654 | 2.547229  | 0.053179  |
| O | -3.711886 | 0.116062  | 0.677890  |
| O | -0.771140 | -3.653401 | -3.690562 |
| O | -1.157052 | -2.598589 | 2.684182  |
| O | 1.306628  | -1.856364 | 3.342948  |
| O | 2.704531  | 2.016866  | 2.352849  |
| O | 1.092245  | 3.707415  | 1.106336  |
| O | -1.033791 | 2.400534  | 2.030147  |
| O | -1.894143 | 0.000740  | 2.662844  |
| O | 0.521822  | 0.710040  | 3.305324  |
| O | 0.733152  | -0.531794 | -1.375722 |
| O | -1.254592 | 0.472673  | -0.155776 |
| O | 0.283181  | -1.153664 | 1.036683  |
| O | 4.460025  | -2.122393 | -2.354464 |
| O | 1.102812  | 1.173325  | 0.464398  |
| O | -2.829430 | 3.412279  | -2.658542 |
| O | -4.631487 | -1.675704 | -1.323458 |
| O | -1.576128 | -4.875746 | 1.017380  |
| O | 3.558179  | -3.303994 | 2.423070  |
| O | 5.202975  | 1.235299  | 1.190881  |
| O | 1.785906  | 4.849965  | -1.390885 |
| P | 0.213740  | -0.009580 | -0.008969 |
| W | -2.652915 | 1.423349  | 1.627524  |
| W | -0.413668 | -0.986233 | 3.408373  |
| W | 0.831826  | 2.436100  | 2.557131  |
| W | 0.910596  | 0.779309  | -3.452575 |
| W | -0.249663 | -2.379686 | -2.664084 |
| W | 2.968736  | -1.464036 | -1.816616 |
| W | -2.040831 | 2.239355  | -1.690224 |
| W | -3.168306 | -0.919299 | -0.856413 |
| W | -0.896917 | -3.312157 | 0.893588  |
| W | 2.306566  | -2.337795 | 1.762342  |

|   |           |           |           |
|---|-----------|-----------|-----------|
| W | 3.512057  | 1.087150  | 0.863011  |
| W | 1.410576  | 3.309355  | -0.746772 |
| K | -3.858365 | 7.609617  | 0.127356  |
| O | -4.496103 | 4.906419  | 0.187324  |
| H | -3.941638 | 4.111445  | 0.142121  |
| H | -5.400378 | 4.602516  | 0.011505  |
| O | -1.556389 | 5.276394  | 1.326894  |
| H | -1.272880 | 4.353230  | 1.395796  |
| H | -2.388244 | 5.347607  | 1.848007  |
| O | -6.019673 | 7.005893  | -1.677238 |
| H | -6.462161 | 7.680364  | -2.202364 |
| H | -5.345877 | 6.607289  | -2.272353 |
| O | -7.267802 | 5.108897  | -0.215780 |
| H | -8.114005 | 4.727218  | -0.466820 |
| H | -7.030439 | 5.765005  | -0.907832 |
| O | -3.762949 | 5.855712  | 2.862278  |
| H | -4.564786 | 5.715588  | 2.332409  |
| H | -3.830836 | 6.778319  | 3.170043  |
| O | -1.817395 | 6.238859  | -1.293680 |
| H | -1.599916 | 5.821850  | -0.436844 |
| H | -1.220307 | 6.997233  | -1.422864 |
| O | -3.840413 | 6.115443  | -3.105954 |
| H | -3.121409 | 5.968461  | -2.451203 |
| H | -3.897273 | 5.279745  | -3.582694 |
| O | -6.425187 | 6.715658  | 1.857120  |
| H | -6.889285 | 6.624520  | 2.696158  |
| H | -6.896655 | 6.120648  | 1.237325  |
| O | -3.037702 | 10.287918 | 0.472994  |
| H | -3.592879 | 10.834112 | -0.099019 |
| H | -2.123232 | 10.572364 | 0.325304  |
| O | -5.335586 | 10.354739 | -1.116658 |
| H | -6.012833 | 10.799438 | -1.635719 |
| H | -4.784206 | 9.861605  | -1.759493 |
| O | -1.376139 | 8.047509  | 1.676153  |
| H | -1.117094 | 7.126889  | 1.839461  |
| H | -1.990705 | 8.305754  | 2.386438  |
| O | -0.212453 | 10.081236 | 0.358725  |
| H | 0.624225  | 10.452220 | 0.654045  |
| H | -0.428508 | 9.339362  | 0.967494  |
| O | -3.493669 | 8.890833  | -2.568855 |
| H | -2.532738 | 8.973080  | -2.412034 |
| H | -3.601199 | 8.073426  | -3.079203 |
| O | -5.782069 | 9.439868  | 1.562982  |
| H | -5.751747 | 9.786083  | 0.652552  |
| H | -6.281851 | 8.604640  | 1.531672  |
| O | -3.692788 | 8.657119  | 3.213084  |

|   |            |           |           |
|---|------------|-----------|-----------|
| H | -4.353968  | 9.123694  | 2.654535  |
| H | -3.745436  | 9.069215  | 4.081136  |
| O | -0.745678  | 8.745779  | -1.955059 |
| H | -0.087883  | 8.831691  | -2.652437 |
| H | -0.416904  | 9.289548  | -1.204089 |
| K | -6.815741  | -5.987360 | -0.174481 |
| O | -8.950370  | -7.768030 | -0.459482 |
| H | -8.577315  | -8.612405 | -0.745974 |
| H | -9.650180  | -7.973607 | 0.176481  |
| O | -6.629828  | -9.064329 | -1.310929 |
| H | -6.131030  | -9.823613 | -1.626820 |
| H | -6.379889  | -8.951438 | -0.367598 |
| O | -9.516553  | -4.984894 | 0.457191  |
| H | -9.687980  | -4.059084 | 0.658426  |
| H | -9.651902  | -5.069480 | -0.508764 |
| O | -10.677141 | -7.116069 | 1.659851  |
| H | -11.542842 | -7.055503 | 2.074302  |
| H | -10.479782 | -6.231859 | 1.278261  |
| O | -6.272595  | -8.537123 | 1.365960  |
| H | -7.041122  | -8.278889 | 1.910064  |
| H | -5.510849  | -8.101005 | 1.788502  |
| O | -7.286213  | -6.855891 | -2.993881 |
| H | -6.963606  | -7.656753 | -2.541893 |
| H | -6.519106  | -6.271794 | -3.139767 |
| O | -9.321729  | -5.133632 | -2.325864 |
| H | -8.738897  | -5.877659 | -2.598345 |
| H | -10.020808 | -5.081503 | -2.984741 |
| O | -8.284680  | -7.344778 | 2.966945  |
| H | -8.374141  | -7.687877 | 3.862154  |
| H | -9.198783  | -7.317040 | 2.604503  |
| O | -4.770517  | -4.215517 | 0.331526  |
| H | -5.200821  | -3.392245 | 0.607129  |
| H | -4.082844  | -3.948147 | -0.294724 |
| O | -7.011402  | -2.704846 | 1.159820  |
| H | -7.270116  | -1.815386 | 1.417760  |
| H | -7.277887  | -2.804801 | 0.218143  |
| O | -4.013092  | -6.862935 | -0.563405 |
| H | -3.730783  | -7.778518 | -0.657061 |
| H | -3.936691  | -6.670999 | 0.393727  |
| O | -3.081811  | -4.685483 | -1.943737 |
| H | -2.277033  | -4.701959 | -2.477231 |
| H | -3.156950  | -5.558809 | -1.503127 |
| O | -7.462355  | -3.210412 | -1.488288 |
| H | -6.667991  | -3.473271 | -1.988250 |
| H | -8.187065  | -3.716698 | -1.897664 |
| O | -6.597079  | -5.129919 | 2.566967  |

|   |           |           |           |
|---|-----------|-----------|-----------|
| H | -6.921037 | -4.260009 | 2.274500  |
| H | -7.358867 | -5.671860 | 2.836592  |
| O | -4.362736 | -6.700601 | 2.229784  |
| H | -4.987684 | -5.965626 | 2.404229  |
| H | -3.640043 | -6.595958 | 2.855763  |
| O | -5.564542 | -4.624239 | -3.068337 |
| H | -5.536212 | -4.261662 | -3.960262 |
| H | -4.630750 | -4.600215 | -2.752178 |
| K | 9.215999  | -1.601445 | 0.036362  |
| O | 7.671343  | -3.520904 | -1.923650 |
| H | 8.512937  | -3.921671 | -1.644896 |
| H | 7.008149  | -3.799632 | -1.267229 |
| O | 10.042187 | -4.509751 | -0.571315 |
| H | 10.334215 | -5.383901 | -0.851012 |
| H | 9.567935  | -4.641424 | 0.277729  |
| O | 6.492691  | -1.008211 | -0.161082 |
| H | 6.086836  | -0.249312 | 0.284514  |
| H | 6.513575  | -0.789406 | -1.113671 |
| O | 5.690260  | -3.558916 | 0.143576  |
| H | 4.776259  | -3.767025 | -0.084729 |
| H | 5.788234  | -2.595041 | -0.036879 |
| O | 8.854847  | -4.042201 | 1.802433  |
| H | 7.983732  | -3.815209 | 2.178815  |
| H | 9.503227  | -3.686827 | 2.436850  |
| O | 10.344089 | -1.947942 | -2.468588 |
| H | 10.999880 | -2.646166 | -2.557523 |
| H | 10.802218 | -1.131650 | -2.735260 |
| O | 7.147192  | -0.976679 | -2.878832 |
| H | 7.425812  | -1.897518 | -2.679881 |
| H | 6.286186  | -1.070158 | -3.303611 |
| O | 6.454901  | -2.909266 | 2.719363  |
| H | 5.867732  | -3.117483 | 3.453670  |
| H | 5.953441  | -3.172880 | 1.919566  |
| O | 10.800306 | 0.341367  | 1.259651  |
| H | 10.383464 | 1.208848  | 1.309090  |
| H | 11.640163 | 0.468924  | 0.789631  |
| O | 8.125190  | 1.457659  | 1.192055  |
| H | 7.193755  | 1.711031  | 1.254635  |
| H | 8.279447  | 1.299655  | 0.238352  |
| O | 12.003605 | -2.684709 | 0.569291  |
| H | 11.531673 | -3.429181 | 0.157982  |
| H | 11.677326 | -2.619531 | 1.487432  |
| O | 12.958116 | -0.307211 | -0.408640 |
| H | 13.917055 | -0.269750 | -0.344665 |
| H | 12.700445 | -1.219872 | -0.148937 |
| O | 8.801178  | 0.836832  | -1.455194 |



|   |           |           |           |
|---|-----------|-----------|-----------|
| H | 9.697838  | 0.921092  | -1.830199 |
| H | 8.265716  | 0.392396  | -2.133239 |
| O | 8.438232  | -0.858767 | 2.789801  |
| H | 8.279937  | -0.026570 | 2.301256  |
| H | 7.607549  | -1.365287 | 2.786137  |
| O | 10.698307 | -2.401864 | 3.059415  |
| H | 10.032816 | -1.679620 | 3.064373  |
| H | 11.139072 | -2.372888 | 3.914033  |
| O | 11.416028 | 0.641944  | -2.476322 |
| H | 11.851242 | 1.229264  | -3.101743 |
| H | 12.087674 | 0.408294  | -1.799996 |

M = Rb, E = -7907.90903720

| Atom | X         | Y         | Z         |
|------|-----------|-----------|-----------|
| O    | -4.151650 | -3.027590 | -2.374350 |
| O    | -0.540712 | -5.444516 | 0.114439  |
| O    | -4.150417 | -3.050906 | 2.638128  |
| O    | 0.890146  | 3.344198  | -1.166184 |
| O    | 2.801403  | 2.049061  | 0.139998  |
| O    | 0.918757  | 3.330147  | 1.467234  |
| O    | -1.721191 | 2.733734  | 1.478044  |
| O    | -1.742481 | 2.745952  | -1.135071 |
| O    | 0.593899  | 1.206260  | -2.773587 |
| O    | 2.477125  | -0.045939 | -1.506464 |
| O    | -0.851770 | 5.123179  | 0.174656  |
| O    | 2.501280  | -0.082331 | 1.765891  |
| O    | 0.619081  | 1.171023  | 3.072288  |
| O    | -3.548646 | 1.379488  | 0.174983  |
| O    | -2.060141 | 1.152752  | -3.281402 |
| O    | 0.655715  | -1.409844 | -2.790387 |
| O    | 2.926988  | -2.158584 | 0.115145  |
| O    | 0.695706  | -1.441038 | 3.052975  |
| O    | -2.020613 | 1.108150  | 3.607493  |
| O    | -3.895634 | -0.240032 | -1.949506 |
| O    | -1.976823 | -1.486431 | -3.300835 |
| O    | 3.156447  | 2.505769  | -2.632013 |
| O    | 1.109645  | -3.550129 | -1.194203 |
| O    | 1.115915  | -3.566311 | 1.435909  |
| O    | -1.941845 | -1.537754 | 3.586826  |
| O    | -3.852328 | -0.261446 | 2.271255  |
| O    | -3.431303 | -1.853413 | 0.146468  |
| O    | -1.555493 | -3.105085 | -1.177572 |
| O    | -1.546676 | -3.121525 | 1.440113  |
| O    | 0.362408  | 1.140486  | 0.147573  |
| O    | -1.402367 | -0.165756 | -1.119769 |
| O    | 0.430472  | -1.396870 | 0.129463  |

|    |            |           |           |
|----|------------|-----------|-----------|
| O  | 3.185545   | 2.450689  | 2.904155  |
| O  | -1.384275  | -0.182626 | 1.418969  |
| O  | -4.333151  | 2.527719  | -2.334854 |
| O  | -0.319086  | -0.100100 | -5.140455 |
| O  | 3.288232   | -2.522205 | -2.668644 |
| O  | 3.325436   | -2.583905 | 2.882944  |
| O  | -0.269340  | -0.181248 | 5.429619  |
| O  | -4.311776  | 2.504736  | 2.686091  |
| P  | -0.501226  | -0.150214 | 0.144297  |
| W  | -2.988359  | -1.950928 | -1.734895 |
| W  | -0.302298  | -3.751390 | 0.124915  |
| W  | -2.977753  | -1.970289 | 2.018483  |
| W  | -0.519987  | 3.445691  | 0.164371  |
| W  | 1.981927   | 1.820737  | -1.580319 |
| W  | 1.998909   | 1.763002  | 1.880261  |
| W  | -3.111072  | 1.514940  | -1.701666 |
| W  | -0.618195  | -0.112647 | -3.457271 |
| W  | 2.075124   | -1.911189 | -1.620954 |
| W  | 2.095417   | -1.963352 | 1.853969  |
| W  | -0.584273  | -0.174933 | 3.749560  |
| W  | -3.083844  | 1.498833  | 2.048234  |
| Rb | -8.863685  | 0.081992  | -0.593082 |
| O  | -6.768494  | -0.053021 | -2.630158 |
| H  | -5.819057  | -0.165376 | -2.473417 |
| H  | -6.939977  | -0.417382 | -3.511422 |
| O  | -6.028399  | -0.284396 | 0.326540  |
| H  | -5.066295  | -0.273661 | 0.433398  |
| H  | -6.221866  | -1.126174 | -0.149857 |
| O  | -9.750993  | 0.992710  | -3.372823 |
| H  | -10.629642 | 1.300469  | -3.617333 |
| H  | -9.236507  | 1.801915  | -3.174846 |
| O  | -8.419044  | -0.948797 | -4.713228 |
| H  | -8.586678  | -1.110936 | -5.646260 |
| H  | -8.967236  | -0.175350 | -4.455472 |
| O  | -6.990113  | -2.645938 | -0.629941 |
| H  | -7.482670  | -2.643668 | -1.470613 |
| H  | -7.658406  | -2.918719 | 0.028207  |
| O  | -6.754559  | 2.473831  | -0.183286 |
| H  | -6.345459  | 1.597523  | -0.081217 |
| H  | -7.283146  | 2.628035  | 0.623171  |
| O  | -8.402594  | 3.131649  | -2.234817 |
| H  | -7.679418  | 2.907419  | -1.600775 |
| H  | -8.120598  | 3.930818  | -2.690798 |
| O  | -9.053220  | -2.630416 | -2.632562 |
| H  | -9.152666  | -3.540003 | -2.934540 |
| H  | -8.881568  | -2.111400 | -3.451218 |

|    |            |           |           |
|----|------------|-----------|-----------|
| O  | -10.663426 | -0.108189 | 1.736183  |
| H  | -11.513726 | 0.220945  | 1.418437  |
| H  | -10.461891 | 0.376757  | 2.551347  |
| O  | -12.124148 | 0.471457  | -0.631987 |
| H  | -12.945096 | 0.616156  | -1.111983 |
| H  | -11.652681 | 1.332548  | -0.650197 |
| O  | -7.484463  | -0.946108 | 2.682555  |
| H  | -6.861912  | -0.687747 | 1.975610  |
| H  | -8.072866  | -1.611478 | 2.279710  |
| O  | -9.006210  | 1.055289  | 3.664396  |
| H  | -8.845521  | 1.222666  | 4.597758  |
| H  | -8.384976  | 0.333768  | 3.394073  |
| O  | -10.555030 | 2.733670  | -0.418572 |
| H  | -10.080324 | 2.877834  | 0.422157  |
| H  | -9.950422  | 3.074909  | -1.101927 |
| O  | -11.021736 | -2.199263 | -0.603360 |
| H  | -11.489495 | -1.348276 | -0.673092 |
| H  | -10.573711 | -2.341685 | -1.456318 |
| O  | -9.062492  | -2.861681 | 1.242087  |
| H  | -9.875239  | -2.607989 | 0.750313  |
| H  | -9.272669  | -3.690693 | 1.683971  |
| O  | -8.743790  | 2.977057  | 1.754381  |
| H  | -8.661444  | 3.852900  | 2.146463  |
| H  | -8.824644  | 2.355379  | 2.516502  |
| Rb | 6.184794   | -6.048258 | -0.350860 |
| O  | 8.384485   | -4.122516 | -0.982385 |
| H  | 9.055250   | -4.313596 | -0.308959 |
| H  | 8.811806   | -4.225612 | -1.843881 |
| O  | 9.382895   | -5.270876 | 1.382474  |
| H  | 10.155919  | -5.253078 | 1.954347  |
| H  | 9.426692   | -6.119342 | 0.885822  |
| O  | 5.799990   | -3.984547 | -2.684512 |
| H  | 4.974918   | -3.678916 | -3.082053 |
| H  | 5.864334   | -3.457553 | -1.856013 |
| O  | 8.186474   | -4.653163 | -3.741285 |
| H  | 8.356327   | -4.387775 | -4.649922 |
| H  | 7.287507   | -4.317809 | -3.512059 |
| O  | 9.302248   | -7.450955 | -0.257469 |
| H  | 9.087702   | -7.308297 | -1.198176 |
| H  | 8.810597   | -8.257894 | -0.014699 |
| O  | 6.950772   | -3.915473 | 1.937512  |
| H  | 7.770943   | -4.441165 | 1.897252  |
| H  | 6.244452   | -4.502145 | 2.253820  |
| O  | 5.734984   | -2.662574 | -0.266941 |
| H  | 6.246978   | -3.042293 | 0.475235  |
| H  | 4.819516   | -2.585971 | 0.043876  |

|    |          |            |           |
|----|----------|------------|-----------|
| O  | 8.225686 | -7.242955  | -2.889150 |
| H  | 8.747249 | -7.788978  | -3.487560 |
| H  | 8.222218 | -6.347060  | -3.303526 |
| O  | 4.458782 | -8.309809  | 0.732718  |
| H  | 3.759495 | -8.443915  | 0.078649  |
| H  | 4.021497 | -8.218252  | 1.591376  |
| O  | 3.450796 | -7.820143  | -1.840930 |
| H  | 2.808431 | -7.941738  | -2.546410 |
| H  | 3.267905 | -6.934633  | -1.456068 |
| O  | 6.905172 | -7.511426  | 2.320237  |
| H  | 7.739733 | -7.403202  | 2.787767  |
| H  | 7.027119 | -8.302158  | 1.754620  |
| O  | 4.410281 | -7.512615  | 3.423206  |
| H  | 4.273275 | -7.682172  | 4.359771  |
| H  | 5.373378 | -7.605236  | 3.254011  |
| O  | 3.247974 | -5.413046  | -0.541355 |
| H  | 3.386552 | -5.343905  | 0.423485  |
| H  | 2.507818 | -4.821865  | -0.747653 |
| O  | 6.072689 | -8.854990  | -1.941900 |
| H  | 5.169839 | -8.499725  | -2.044882 |
| H  | 6.664281 | -8.309676  | -2.489144 |
| O  | 7.435682 | -9.431918  | 0.366923  |
| H  | 6.810105 | -9.334343  | -0.387176 |
| H  | 7.551573 | -10.377194 | 0.502752  |
| O  | 4.339443 | -5.137390  | 2.051816  |
| H  | 3.952740 | -4.372843  | 2.507941  |
| H  | 4.218724 | -5.901135  | 2.656183  |
| Rb | 5.536606 | 6.961861   | -0.297242 |
| O  | 7.903974 | 5.832578   | -1.674275 |
| H  | 8.215294 | 5.153222   | -1.059599 |
| H  | 7.789345 | 5.403716   | -2.533913 |
| O  | 7.836196 | 4.675308   | 0.892129  |
| H  | 8.223405 | 4.064067   | 1.525935  |
| H  | 6.974027 | 4.280796   | 0.631744  |
| O  | 6.432332 | 8.173411   | -2.997422 |
| H  | 6.061042 | 8.973140   | -3.383199 |
| H  | 7.220300 | 8.467511   | -2.497256 |
| O  | 6.697256 | 5.756936   | -4.233449 |
| H  | 6.770829 | 5.723235   | -5.191671 |
| H  | 6.648783 | 6.707338   | -3.989851 |
| O  | 5.478829 | 3.777152   | -0.197532 |
| H  | 5.382391 | 4.035958   | -1.132961 |
| H  | 4.585388 | 3.926324   | 0.161391  |
| O  | 8.342426 | 7.478975   | 1.094751  |
| H  | 8.194479 | 6.518907   | 1.173451  |
| H  | 7.771884 | 7.920572   | 1.749730  |

|   |          |           |           |
|---|----------|-----------|-----------|
| O | 8.263048 | 9.099638  | -1.116211 |
| H | 8.452350 | 8.452738  | -0.399910 |
| H | 9.089275 | 9.562213  | -1.286655 |
| O | 4.607785 | 4.949036  | -2.644908 |
| H | 4.118998 | 4.158773  | -2.924937 |
| H | 5.263821 | 5.134354  | -3.351342 |
| O | 3.334659 | 8.266986  | 1.195915  |
| H | 3.003606 | 8.969656  | 0.620590  |
| H | 3.404911 | 8.642583  | 2.085127  |
| O | 3.412956 | 9.413106  | -1.360786 |
| H | 3.099415 | 10.047338 | -2.012440 |
| H | 4.282161 | 9.752148  | -1.053359 |
| O | 4.825610 | 5.911442  | 2.570192  |
| H | 5.139426 | 5.102256  | 2.986505  |
| H | 4.062517 | 5.638777  | 2.016376  |
| O | 4.392947 | 8.284118  | 3.805228  |
| H | 4.272311 | 8.310699  | 4.758884  |
| H | 4.497910 | 7.337277  | 3.558358  |
| O | 5.802499 | 10.141124 | -0.199734 |
| H | 5.908520 | 9.957043  | 0.752847  |
| H | 6.691979 | 9.995374  | -0.570593 |
| O | 2.619558 | 6.676082  | -1.568890 |
| H | 2.838314 | 7.625440  | -1.597466 |
| H | 3.216354 | 6.234691  | -2.199070 |
| O | 3.057170 | 5.077706  | 0.629613  |
| H | 2.766590 | 5.698491  | -0.075669 |
| H | 2.264290 | 4.586672  | 0.894189  |
| O | 6.535194 | 9.237910  | 2.400521  |
| H | 7.037848 | 9.911766  | 2.870795  |
| H | 5.815406 | 8.974125  | 3.018854  |

M = Cs, E = -7895.90619142

| Atom | X         | Y         | Z         |
|------|-----------|-----------|-----------|
| O    | -1.743806 | -4.181599 | -2.959115 |
| O    | -1.277865 | 0.431316  | -4.822842 |
| O    | 2.780757  | -2.224312 | -3.699733 |
| O    | -1.053242 | -0.096983 | 4.146701  |
| O    | -0.799602 | 2.344437  | 3.155581  |
| O    | 1.352405  | 0.930833  | 3.756276  |
| O    | 2.126056  | -1.372083 | 2.588160  |
| O    | -0.244468 | -2.389287 | 2.980512  |
| O    | -2.866108 | -0.658945 | 2.246819  |
| O    | -2.630868 | 1.744199  | 1.271838  |
| O    | 1.174048  | -1.449959 | 5.280507  |
| O    | 0.334408  | 3.049306  | 0.799183  |
| O    | 2.432444  | 1.601818  | 1.384198  |

|    |           |           |           |
|----|-----------|-----------|-----------|
| O  | 1.269277  | -3.313964 | 1.063074  |
| O  | -2.444976 | -3.263374 | 1.673738  |
| O  | -3.482369 | -0.191186 | -0.252609 |
| O  | -1.774079 | 3.103862  | -0.889015 |
| O  | 1.868894  | 2.123554  | -1.111693 |
| O  | 3.828566  | -0.586043 | 0.664156  |
| O  | -0.875444 | -4.190592 | -0.258450 |
| O  | -3.053388 | -2.777617 | -0.865832 |
| O  | -3.412852 | 1.510914  | 3.986242  |
| O  | -2.641814 | 1.136768  | -2.433880 |
| O  | -0.231839 | 2.153504  | -2.824638 |
| O  | 3.211826  | -0.101290 | -1.860184 |
| O  | 2.966108  | -2.545302 | -0.882780 |
| O  | 0.540938  | -2.751194 | -2.020051 |
| O  | -1.590163 | -1.347905 | -2.612927 |
| O  | 0.777949  | -0.321820 | -2.976467 |
| O  | -0.138512 | 0.261262  | 1.720936  |
| O  | -0.980631 | -1.617026 | 0.238248  |
| O  | -0.718822 | 0.725765  | -0.698053 |
| O  | 1.712571  | 3.684400  | 3.202256  |
| O  | 1.333589  | -0.647323 | -0.132897 |
| O  | -0.474001 | -5.167919 | 2.383016  |
| O  | -4.999984 | -2.168067 | 1.094266  |
| O  | -4.518171 | 2.443569  | -0.750743 |
| O  | 0.527584  | 4.585547  | -1.592697 |
| O  | 4.624406  | 1.896609  | -0.438279 |
| O  | 4.037106  | -3.273501 | 1.637371  |
| P  | -0.128865 | -0.321438 | 0.282363  |
| W  | -1.352194 | -3.045596 | -1.743081 |
| W  | -1.000563 | 0.405886  | -3.136647 |
| W  | 2.042544  | -1.582891 | -2.291263 |
| W  | 0.671336  | -0.874022 | 3.752325  |
| W  | -2.141859 | 0.973829  | 2.966738  |
| W  | 1.003389  | 2.312676  | 2.455417  |
| W  | -0.572142 | -3.659676 | 1.585477  |
| W  | -3.358199 | -1.799235 | 0.792120  |
| W  | -3.008704 | 1.643312  | -0.607310 |
| W  | 0.130115  | 2.987670  | -1.130483 |
| W  | 3.181098  | 0.982573  | -0.273984 |
| W  | 2.824941  | -2.216383 | 1.015241  |
| Cs | 5.815518  | -5.406843 | -0.307151 |
| O  | 3.610892  | -7.768192 | -0.955415 |
| H  | 2.778217  | -7.395542 | -1.270956 |
| H  | 3.965630  | -8.300701 | -1.683682 |
| O  | 1.883565  | -5.510211 | -0.977708 |
| H  | 1.205898  | -4.827353 | -0.874650 |

|    |           |           |           |
|----|-----------|-----------|-----------|
| H  | 2.529123  | -5.137210 | -1.613868 |
| O  | 6.515418  | -8.643298 | 0.127677  |
| H  | 7.318797  | -8.987219 | 0.528292  |
| H  | 5.887567  | -8.490495 | 0.868432  |
| O  | 5.667874  | -8.987585 | -2.436006 |
| H  | 5.905115  | -9.833405 | -2.827365 |
| H  | 6.057370  | -8.980902 | -1.533429 |
| O  | 3.797118  | -4.740773 | -2.880880 |
| H  | 4.269642  | -5.502152 | -3.302282 |
| H  | 3.331367  | -4.285430 | -3.594303 |
| O  | 2.869620  | -6.086082 | 1.582822  |
| H  | 2.517332  | -5.890895 | 0.688413  |
| H  | 2.982423  | -5.223634 | 1.999369  |
| O  | 4.900770  | -7.834773 | 2.194107  |
| H  | 4.127729  | -7.287960 | 1.932187  |
| H  | 4.550459  | -8.490177 | 2.804544  |
| O  | 5.406881  | -6.634299 | -3.905554 |
| H  | 6.245220  | -6.133160 | -3.914175 |
| H  | 5.588001  | -7.473109 | -3.438582 |
| O  | 8.464566  | -3.489170 | -0.805246 |
| H  | 9.258187  | -3.862881 | -0.388468 |
| H  | 8.350115  | -2.617956 | -0.408645 |
| O  | 10.193672 | -5.344406 | 0.374158  |
| H  | 11.086082 | -5.513481 | 0.689430  |
| H  | 9.587346  | -5.472045 | 1.138841  |
| O  | 5.908240  | -2.783602 | -2.545804 |
| H  | 5.089981  | -3.293767 | -2.685712 |
| H  | 6.616325  | -3.372165 | -2.868928 |
| O  | 6.426525  | -1.633434 | -0.099141 |
| H  | 5.652681  | -1.099992 | 0.135624  |
| H  | 6.202230  | -2.042555 | -0.965945 |
| O  | 8.100287  | -5.538898 | 2.083588  |
| H  | 7.713773  | -4.646844 | 2.237750  |
| H  | 8.128649  | -5.963104 | 2.946613  |
| O  | 8.685334  | -6.425313 | -1.670361 |
| H  | 9.346196  | -6.154411 | -1.000406 |
| H  | 8.900428  | -7.334512 | -1.899488 |
| O  | 7.563142  | -4.872724 | -3.612820 |
| H  | 8.139909  | -5.320430 | -2.954314 |
| H  | 8.135122  | -4.644177 | -4.352305 |
| O  | 6.856860  | -3.096144 | 2.248628  |
| H  | 5.941787  | -3.202450 | 2.539882  |
| H  | 6.764950  | -2.601488 | 1.406082  |
| Cs | 4.426119  | 7.532553  | -0.289749 |
| O  | 2.300566  | 8.434310  | 2.086024  |
| H  | 2.102497  | 9.351113  | 1.835203  |

|   |          |           |           |
|---|----------|-----------|-----------|
| H | 1.513649 | 7.919295  | 1.864442  |
| O | 2.607844 | 11.024279 | 1.019418  |
| H | 2.264213 | 11.903711 | 1.204028  |
| H | 2.409838 | 10.842933 | 0.075194  |
| O | 3.766864 | 5.430928  | 2.097690  |
| H | 3.469203 | 4.787624  | 2.753809  |
| H | 4.199822 | 6.149982  | 2.607970  |
| O | 1.228739 | 6.040812  | 1.085507  |
| H | 0.747949 | 5.203624  | 1.047254  |
| H | 2.113965 | 5.809459  | 1.444707  |
| O | 2.092720 | 10.073300 | -1.538032 |
| H | 1.603078 | 9.228646  | -1.370086 |
| H | 1.474159 | 10.634215 | -2.019090 |
| O | 5.037659 | 9.937208  | 1.848812  |
| H | 4.243275 | 10.460431 | 1.622546  |
| H | 5.738770 | 10.578071 | 1.998490  |
| O | 5.194366 | 7.530099  | 3.273614  |
| H | 5.011570 | 8.405849  | 2.875857  |
| H | 4.971069 | 7.634632  | 4.203733  |
| O | 1.034762 | 7.619187  | -1.232008 |
| H | 1.358479 | 7.112527  | -2.000895 |
| H | 1.049586 | 6.996121  | -0.478908 |
| O | 5.778900 | 6.310763  | -3.008211 |
| H | 6.252285 | 5.487077  | -2.831775 |
| H | 6.439650 | 6.946032  | -3.319760 |
| O | 6.289563 | 4.006281  | -1.430519 |
| H | 6.138609 | 3.139773  | -1.029891 |
| H | 6.663566 | 4.570989  | -0.720680 |
| O | 3.998812 | 8.965002  | -3.390682 |
| H | 3.369102 | 9.463606  | -2.839229 |
| H | 3.594583 | 8.084014  | -3.510415 |
| O | 6.722026 | 8.932263  | -3.276656 |
| H | 7.113153 | 9.584013  | -3.865609 |
| H | 5.746966 | 9.064065  | -3.327082 |
| O | 7.190951 | 5.866774  | 0.397821  |
| H | 7.543313 | 6.688531  | -0.000278 |
| H | 7.828557 | 5.609527  | 1.070587  |
| O | 3.573690 | 4.663164  | -1.697482 |
| H | 4.511467 | 4.381861  | -1.650027 |
| H | 3.049176 | 3.887878  | -1.459975 |
| O | 2.517580 | 6.550143  | -3.361904 |
| H | 2.943125 | 5.774356  | -2.931597 |
| H | 2.112490 | 6.214192  | -4.167646 |
| O | 7.615357 | 8.359754  | -0.724079 |
| H | 8.225527 | 9.015483  | -0.375057 |
| H | 7.412470 | 8.642336  | -1.640532 |



|    |            |           |           |
|----|------------|-----------|-----------|
| Cs | -9.632865  | -0.171603 | -0.568692 |
| O  | -12.930145 | -0.241948 | -0.763802 |
| H  | -13.247839 | 0.577038  | -0.352378 |
| H  | -13.226244 | -0.216264 | -1.684503 |
| O  | -12.916578 | 2.078915  | 0.799295  |
| H  | -13.483230 | 2.768471  | 1.156955  |
| H  | -12.298951 | 2.517665  | 0.172213  |
| O  | -11.409010 | -2.735854 | -1.836209 |
| H  | -11.192005 | -3.649759 | -2.041442 |
| H  | -11.606720 | -2.719467 | -0.875715 |
| O  | -12.654087 | -0.916968 | -3.467322 |
| H  | -13.026291 | -1.271193 | -4.280139 |
| H  | -12.245664 | -1.675472 | -2.994625 |
| O  | -11.077915 | 2.852809  | -1.058172 |
| H  | -11.145586 | 2.410752  | -1.930897 |
| H  | -10.866211 | 3.771547  | -1.247870 |
| O  | -11.619792 | -0.034389 | 2.073325  |
| H  | -12.127171 | 0.746382  | 1.774786  |
| H  | -11.511747 | 0.072834  | 3.022794  |
| O  | -11.503043 | -2.593131 | 0.951820  |
| H  | -11.743783 | -1.735722 | 1.357216  |
| H  | -11.994207 | -3.256387 | 1.445352  |
| O  | -10.951684 | 1.254988  | -3.297914 |
| H  | -10.676094 | 1.595580  | -4.153974 |
| H  | -11.568305 | 0.516875  | -3.490244 |
| O  | -6.448383  | 0.036560  | -0.419985 |
| H  | -5.990794  | -0.679152 | -0.889153 |
| H  | -5.944834  | 0.151014  | 0.399468  |
| O  | -5.765178  | -2.227703 | -2.020014 |
| H  | -4.878011  | -2.572653 | -1.845535 |
| H  | -6.366667  | -2.665678 | -1.377891 |
| O  | -7.798261  | 2.278441  | 0.879220  |
| H  | -8.064573  | 3.182382  | 1.074467  |
| H  | -7.569580  | 2.284196  | -0.075504 |
| O  | -5.922228  | 0.765722  | 2.241849  |
| H  | -5.315264  | 1.138714  | 2.893462  |
| H  | -6.499910  | 1.494816  | 1.933703  |
| O  | -7.739863  | -2.945140 | -0.250767 |
| H  | -7.607028  | -2.440575 | 0.579860  |
| H  | -7.871466  | -3.856039 | 0.029962  |
| O  | -7.518704  | -0.239542 | -3.104207 |
| H  | -6.820961  | -0.888398 | -2.904727 |
| H  | -7.645510  | -0.291296 | -4.056618 |
| O  | -7.188879  | 2.398536  | -1.923713 |
| H  | -7.286320  | 1.496347  | -2.283883 |
| H  | -6.260514  | 2.406478  | -1.640892 |

|   |           |           |          |
|---|-----------|-----------|----------|
| O | -7.897339 | -1.309225 | 2.038616 |
| H | -8.039158 | -1.754413 | 2.880004 |
| H | -7.128218 | -0.728243 | 2.189382 |
